# Supplementary material for: Tumor Stimulus-Responsive Biodegradable Diblock Copolymer Conjugates as Efficient Anti-Cancer Nanomedicines
Source: MDPI journal article supplement (doi:10.3390/jpm12050698), 2022-04-27
Supplement: s1 [file s1]

## Supporting information

### **Tumor Stimulus-responsive Biodegradable Diblock Copolymer Conjugates as Efficient anti-cancer nanomedicines**

Vladimír Šubr<sup>a</sup>, Robert Pola<sup>a</sup>,Shanghai Gao<sup>b</sup>, Rayhanul Islam<sup>b</sup>, Takuma Hirata<sup>b</sup>, Daiki Miyake<sup>b</sup>, Kousuke Koshino<sup>b</sup>, Jian-Rong Zhou<sup>b</sup>, Kazumi Yokomizo<sup>b</sup>, Jun Fang<sup>b#</sup>, Tomáš Etrych<sup>a\*</sup>

<sup>a</sup> Institute of Macromolecular Chemistry, Academy of Sciences of the Czech Republic, Heyrovsky Sq. 2, 162 06 Prague 6, Czech Republic,

<sup>b</sup> Faculty of Pharmaceutical Sciences, Sojo University, Ikeda 4-22-1, Kumamoto Nishi-ku, Japan 860-0082.

\*Corresponding Author: Tomáš Etrych.

E-mail address: [etrych@imc.cas.cz](mailto:etrych@imc.cas.cz)

#Co-corresponding author for the biology part: Jun Fang

E-mail address: [fangjun@ph.sojo-u.ac.jp](mailto:fangjun@ph.sojo-u.ac.jp)

The authors wish to dedicate the paper to the honor of Hiroshi Maeda, a pioneer in the field of the drug delivery.

[A]

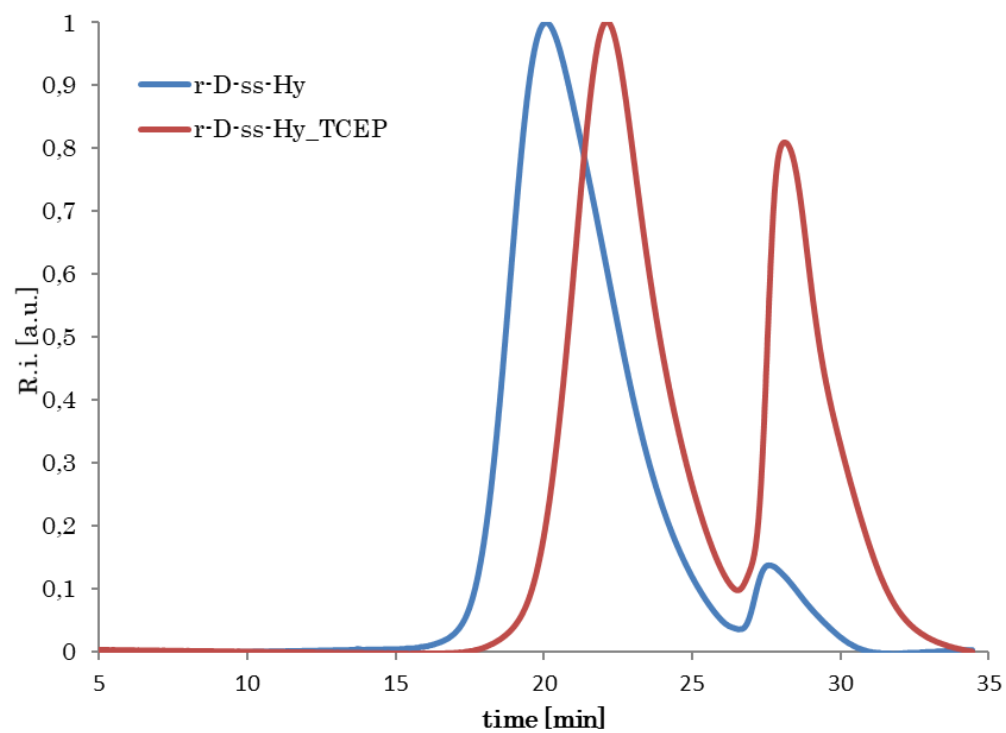

[B]

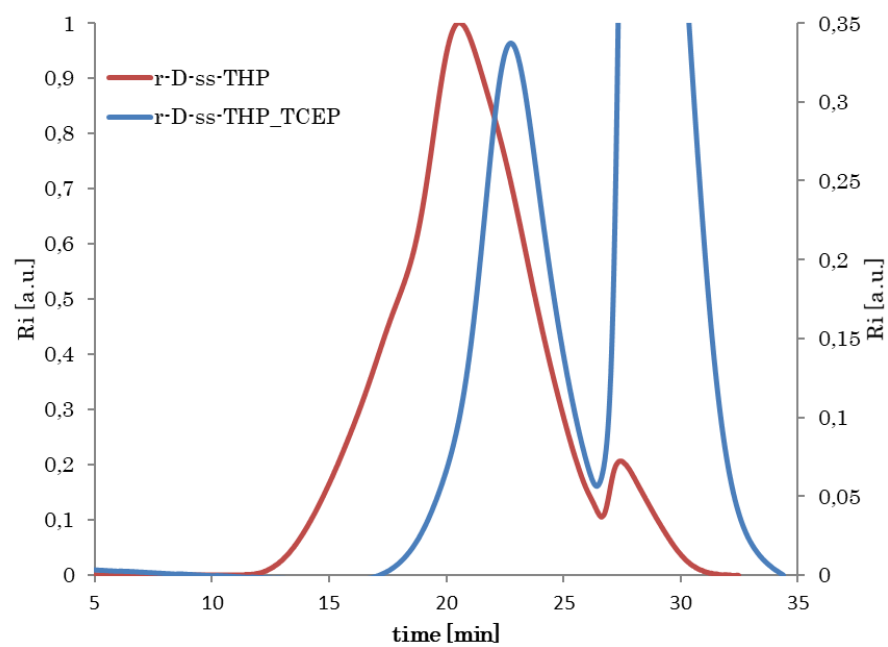

[C]

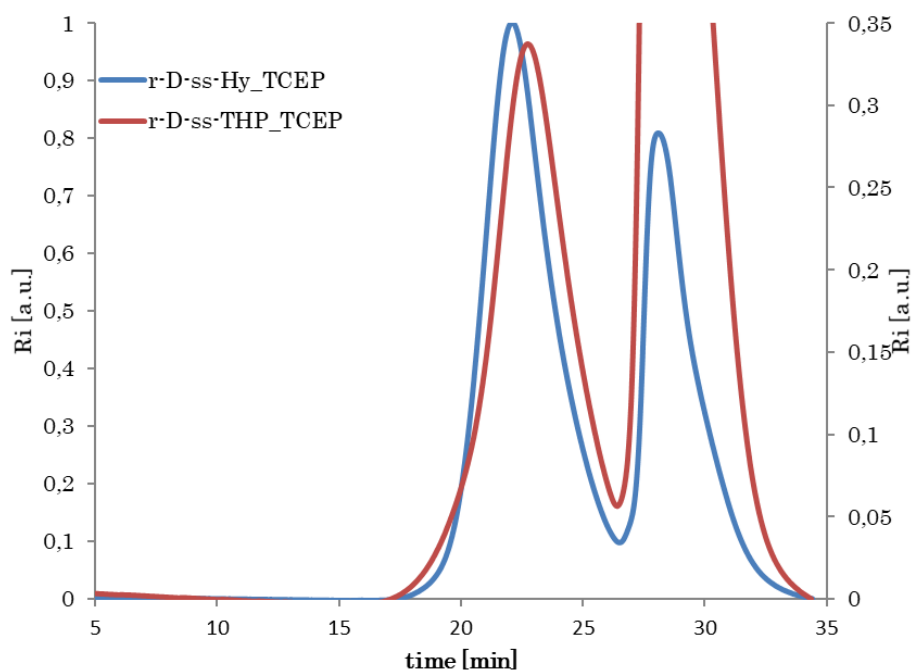

**SI\_Figure S1.** GPC profiles of diblock polymers before and after the reduction: Comparison of GPC profiles of **r-D-ss-Hy** before and after incubation with TCEP [A], Comparison of GPC profiles of **r-D-ss-THP** before and after incubation with TCEP [B], Comparison of GPC profiles of **r-D-ss-Hy** and **r-D-ss-THP** after incubation with TCEP [C].
